# Supplementary material for: Muricholic Acids Promote Resistance to Hypercholesterolemia in Cholesterol-Fed Mice
Source: MDPI journal article supplement (doi:10.3390/ijms22137163), 2021-07-02
Supplement: s1 [file s1]

Figure S1

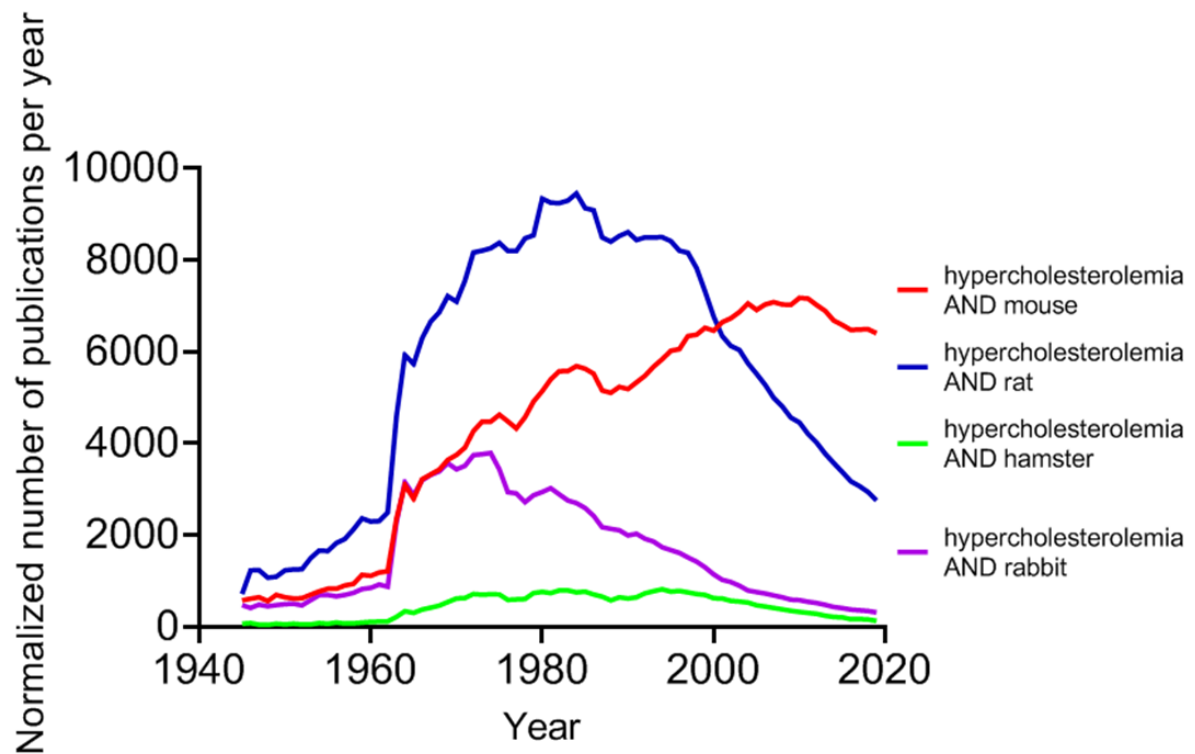

**Figure S1. Bibliometric analysis of PubMed Indexed publications on hypercholesterolemia in common laboratory animals.**

Normalized number of publications per 100000 publications per year from PubMed searches(<https://esperr.github.io/pubmed-by-year/>)

Figure S2

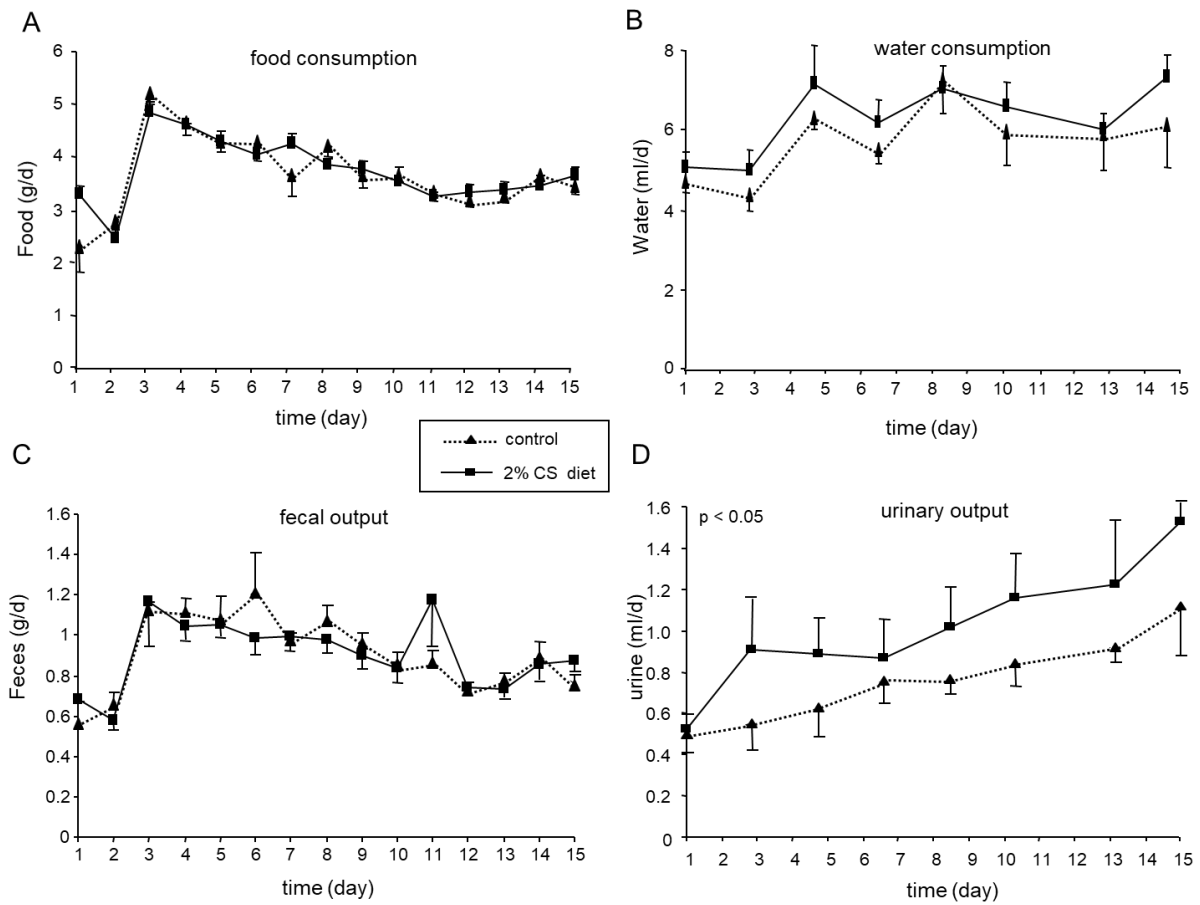

**Figure S2. Assessment of food and water consumption along with fecal and urinary outputs in cholesterol-fed mice.**

8 weeks-old mice fed a standard diet (control) or a 2% cholesterol-enriched diet for 15 days (2% CS) were housed in metabolic cages. (A) Food and (B) water intake were monitored daily as well as (C) fecal and (D) urinary outputs. Graphs represent mean  $\pm$  s.e.m (n=8 per group).  $P < 0.05$  determined by ANOVA2 with repeated measures.

Figure S3

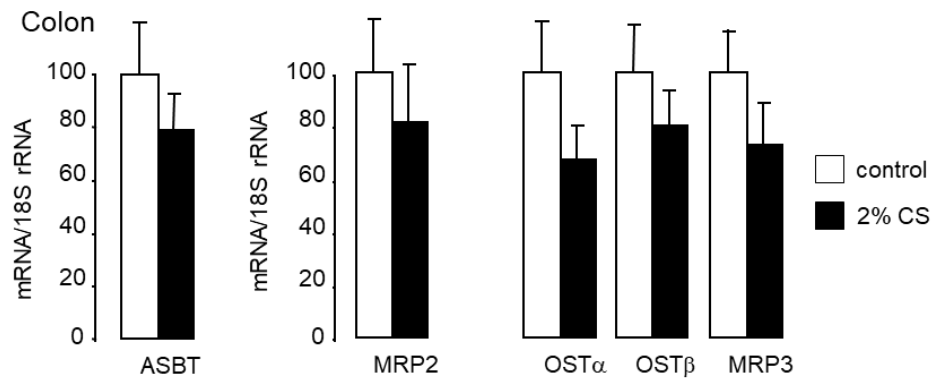

**Figure S3. Gene expression of colon bile acid transporters in cholesterol-fed mice.**

mRNA levels of bile acid transporters in the colon of standard diet (control) or 2% cholesterol-fed (2% CS) mice. Bar graphs represent mean  $\pm$  s.e.m (n=8 per group).

**Table S1. Composition of liver bile acid pool in control and cholesterol-fed mice.**

Mean  $\pm$  s.e.m (n=8 per group). *P* value were determined by Student's t-test with Welch's correction.

|                         | Heuman's<br>Hydrophobicity Index<br>(HI) | Intrahepatic concentration (ng/mg) |                                     | <i>T</i> -test | Percentage (%)                     |                                    | <i>T</i> -test |
|-------------------------|------------------------------------------|------------------------------------|-------------------------------------|----------------|------------------------------------|------------------------------------|----------------|
|                         |                                          | Ctrl                               | 2% CS                               | <i>P</i> value | Ctrl                               | 2% CS                              | <i>P</i> value |
| LCA                     | +1                                       | 1.07 $\pm$ 0.18                    | 1.21 $\pm$ 0.17                     | 0.59           | 1.20 $\pm$ 0.26                    | 1.01 $\pm$ 0.11                    | 0.49           |
| DCA                     | + 0,59                                   | 2.10 $\pm$ 0.99                    | 3.22 $\pm$ 0.71                     | 0.37           | 2.06 $\pm$ 0.88                    | 2.66 $\pm$ 0.6                     | 0.58           |
| CDCA                    | +0,46                                    | 4.84 $\pm$ 0.95                    | 5.81 $\pm$ 0.48                     | 0.36           | 5.03 $\pm$ 0.68                    | 4.90 $\pm$ 0.3                     | 0.86           |
| CA                      | 0                                        | 41.13 $\pm$ 6.4                    | 34.34 $\pm$ 3.55                    | 0.36           | <b>43.64 <math>\pm</math> 5.01</b> | <b>29.07 <math>\pm</math> 2.75</b> | <b>0.025</b>   |
| HDCA                    | -0,35                                    | 1.23 $\pm$ 0.14                    | 1.15 $\pm$ 0.28                     | 0.81           | 1.35 $\pm$ 0.2                     | 0.93 $\pm$ 0.18                    | 0.16           |
| $\beta$ -MCA            | -0,78                                    | <b>33.26 <math>\pm</math> 4.96</b> | <b>62.98 <math>\pm</math> 4.69</b>  | <b>0.002</b>   | <b>36.40 <math>\pm</math> 5.52</b> | <b>53.23 <math>\pm</math> 3.45</b> | <b>0.025</b>   |
| $\alpha$ -MCA           | -0,84                                    | 9.52 $\pm$ 1.03                    | 9.70 $\pm$ 1.47                     | 0.92           | 10.19 $\pm$ 0.93                   | 8.08 $\pm$ 0.99                    | 0.16           |
| Primary BA              | /                                        | <b>88.85 <math>\pm</math> 5.53</b> | <b>115.16 <math>\pm</math> 4.97</b> | <b>0.009</b>   | 95.38 $\pm$ 0.74                   | 95.17 $\pm$ 0.80                   | 0.99           |
| Secondary BA            | /                                        | 4.40 $\pm$ 0.92                    | 5.97 $\pm$ 1.04                     | 0.41           | 4.62 $\pm$ 0.74                    | 4.83 $\pm$ 0.80                    | 0.99           |
| Primary BA/Secondary BA | /                                        | 22,8 $\pm$ 3,49                    | 24,75 $\pm$ 6,73                    | 0,750          | /                                  | /                                  | /              |
| Total                   | /                                        | <b>93.25 <math>\pm</math> 6.15</b> | <b>118.55 <math>\pm</math> 5.66</b> | <b>0.014</b>   | 100                                | 100                                | /              |

**Table S2. Composition of fecal bile acid pool in control and cholesterol-fed mice.**

Mean  $\pm$  s.e.m (n=8 per group). *P* value were determined by Student's t-test with Welch's correction.

|                         | Heuman's<br>Hydrophobicity Index<br>(HI) | Fecal excretion ( $\mu$ g/days)      |                                      | <i>T</i> -test              | Percentage (%)                     |                                    | <i>T</i> -test |
|-------------------------|------------------------------------------|--------------------------------------|--------------------------------------|-----------------------------|------------------------------------|------------------------------------|----------------|
|                         |                                          | Ctrl                                 | 2% CS                                | <i>P</i> value              | Ctrl                               | 2% CS                              | <i>P</i> value |
| LCA                     | +1                                       | <b>9.44 <math>\pm</math> 0.46</b>    | <b>25.38 <math>\pm</math> 5.11</b>   | <b>0.01</b>                 | 3.77 $\pm$ 0.22                    | 4.47 $\pm$ 0.74                    | 0.4            |
| DCA                     | + 0,59                                   | <b>174.94 <math>\pm</math> 13.84</b> | <b>295.11 <math>\pm</math> 29.33</b> | <b>0.004</b>                | <b>68.61 <math>\pm</math> 1.2</b>  | <b>53.35 <math>\pm</math> 2.58</b> | <b>0.0003</b>  |
| CDCA                    | +0,46                                    | <b>4.41 <math>\pm</math> 0.38</b>    | <b>10.04 <math>\pm</math> 2.281</b>  | <b>0.03</b>                 | 1.74 $\pm$ 0.1                     | 1.73 $\pm$ 0.35                    | 0.9            |
| CA                      | 0                                        | <b>14.48 <math>\pm</math> 1.82</b>   | <b>50.02 <math>\pm</math> 16.15</b>  | <b>0.05</b>                 | 5.64 $\pm$ 0.45                    | 8.92 $\pm$ 2.83                    | 0.3            |
| HDCA                    | -0,35                                    | <b>2.97 <math>\pm</math> 0.18</b>    | <b>8.52 <math>\pm</math> 1.89</b>    | <b>0.01</b>                 | 1.19 $\pm$ 0.11                    | 1.48 $\pm$ 0.25                    | 0.3            |
| $\beta$ -MCA            | -0,78                                    | <b>36.11 <math>\pm</math> 3.17</b>   | <b>110.77 <math>\pm</math> 7.96</b>  | <b>0.55x10<sup>-5</sup></b> | <b>14.21 <math>\pm</math> 0.97</b> | <b>20.39 <math>\pm</math> 1.43</b> | <b>0.005</b>   |
| $\alpha$ -MCA           | -0,84                                    | <b>12.29 <math>\pm</math> 0.9</b>    | <b>54.86 <math>\pm</math> 7.88</b>   | <b>0.0003</b>               | <b>4.83 <math>\pm</math> 0.11</b>  | <b>9.65 <math>\pm</math> 0.88</b>  | <b>0.0003</b>  |
| Primary BA              | /                                        | <b>67.3 <math>\pm</math> 5.62</b>    | <b>225.7 <math>\pm</math> 24.2</b>   | <b>0.8x10<sup>-4</sup></b>  | <b>26.43 <math>\pm</math> 1.25</b> | <b>40.69 <math>\pm</math> 3.03</b> | <b>0.001</b>   |
| Secondary BA            | /                                        | <b>187.35 <math>\pm</math> 14.14</b> | <b>329.01 <math>\pm</math> 34.58</b> | <b>0.003</b>                | <b>73.57 <math>\pm</math> 1.25</b> | <b>59.31 <math>\pm</math> 3.03</b> | <b>0.001</b>   |
| Primary BA/Secondary BA | /                                        | <b>0.36 <math>\pm</math> 0.02</b>    | <b>0.71 <math>\pm</math> 0.1</b>     | <b>0,008</b>                | /                                  | /                                  | /              |
| Total                   | /                                        | <b>254.65 <math>\pm</math> 18.74</b> | <b>554.71 <math>\pm</math> 48.14</b> | <b>0.0002</b>               | 100                                | 100                                | /              |
